# Supplementary material for: Association between Depression, Anxiety Symptoms and Gut Microbiota in Chinese Elderly with Functional Constipation
Source: MDPI journal article supplement (doi:10.3390/nu14235013), 2022-11-25
Supplement: s1 [file s1]

**Association between depression, anxiety symptoms and gut microbiota in Chinese elderly with functional constipation.**

**Supplementary Materials:**

**Table S1:** Correlation of depression and anxiety with other influencing factors. (*n* = 198, %)

|                                 | Total | PHQ-9<br>Mild<br>61 (30.8) | $\chi^2$ | <i>p</i>          | GAD-7<br>Mild<br>43 (21.7) | $\chi^2$ | <i>p</i>     |
|---------------------------------|-------|----------------------------|----------|-------------------|----------------------------|----------|--------------|
| BMI<br>(kg/m <sup>2</sup> )     |       |                            | 14.275   | <b>0.001</b>      |                            | 9.252    | <b>0.010</b> |
| < 20                            | 19    | 13 (68.4)                  |          |                   | 9 (47.4)                   |          |              |
| 20.0-26.9                       | 140   | 39 (27.9)                  |          |                   | 29 (20.7)                  |          |              |
| > 26.9                          | 39    | 9 (23.1)                   |          |                   | 5 (12.8)                   |          |              |
| PSQI                            |       |                            | 35.274   | <b>&lt; 0.001</b> |                            | 6.901    | <b>0.009</b> |
| Good                            | 146   | 28 (19.2)                  |          |                   | 25 (17.1)                  |          |              |
| Poor                            | 52    | 33 (63.5)                  |          |                   | 18 (34.6)                  |          |              |
| High<br>dietary<br>fiber intake |       |                            | 12.973   | <b>0.002</b>      |                            | 2.417    | 0.299        |
| Low                             | 68    | 30 (44.1)                  |          |                   | 16 (23.5)                  |          |              |
| Moderate                        | 65    | 21 (32.3)                  |          |                   | 17 (26.2)                  |          |              |
| High                            | 65    | 10 (15.4)                  |          |                   | 10 (15.4)                  |          |              |
| IPAQ                            |       |                            | 8.770    | <b>0.012</b>      |                            | 5.068    | 0.079        |
| Low                             | 48    | 23 (47.9)                  |          |                   | 16 (33.3)                  |          |              |
| Moderate                        | 120   | 31 (25.8)                  |          |                   | 22 (18.3)                  |          |              |
| High                            | 30    | 7 (23.3)                   |          |                   | 5 (16.7)                   |          |              |

BMI: Body mass index. The Pittsburgh Sleep Quality Index, PSQI. The International Physical Activity Questionnaire, IPAQ. Compared using chi-square test. Bold values indicate statistically significant values, *p* < 0.05.
